# Supplementary material for: Cardamonin Attenuates Inflammation and Oxidative Stress in Interleukin-1β-Stimulated Osteoarthritis Chondrocyte through the Nrf2 Pathway
Source: MDPI journal article supplement (doi:10.3390/antiox10060862), 2021-05-27
Supplement: s1 [file s1]

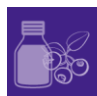

## Supplementary Material

**Table S1.** The antibodies were used in western blotting for the present study.

| Name                 | Catalog Number | Company                                     |
|----------------------|----------------|---------------------------------------------|
| Anti-MMP-13          | ab53015        | Abcam, Cambridge, UK                        |
| Anti-TLR2            | ab191458       | Abcam, Cambridge, UK                        |
| Anti-TLR4            | ab13867        | Abcam, Cambridge, UK                        |
| Anti-HO-1            | ab52947        | Abcam, Cambridge, UK                        |
| Anti-NQO1            | 62262          | Cell Signaling Technology, Danvers, MA, USA |
| Anti-Nrf2            | #12721         | Cell Signaling Technology, Danvers, MA, USA |
| Anti-Akt             | #9272          | Cell Signaling Technology, Danvers, MA, USA |
| Anti-p-Akt           | #9271          | Cell Signaling Technology, Danvers, MA, USA |
| Anti-p38             | #9212          | Cell Signaling Technology, Danvers, MA, USA |
| Anti-p-p38           | #9211          | Cell Signaling Technology, Danvers, MA, USA |
| Anti-ERK1/2          | #9102          | Cell Signaling Technology, Danvers, MA, USA |
| Anti-p-ERK1/2        | #9101          | Cell Signaling Technology, Danvers, MA, USA |
| Anti-SAPK/JNK        | #9252          | Cell Signaling Technology, Danvers, MA, USA |
| Anti-p-SAPK/JNK      | #9251          | Cell Signaling Technology, Danvers, MA, USA |
| Anti-Histone H3      | 4499           | Cell Signaling Technology, Danvers, MA, USA |
| Anti- $\beta$ -actin | sc-47778       | Santa Cruz Biotechnology, Dallas, TX, USA   |
| Anti-rabbit IgG HRP  | P0217          | DAKO, CA, USA                               |
| Anti-mouse IgG (HRP) | P0161          | DAKO, CA, USA                               |
